# Supplementary material for: Tough, recyclable and degradable plastics with multiple functions based on supramolecular covalent adaptive networks
Source: Royal Society of Chemistry journal article supplement (doi:10.1039/d4ta02644f), 2024-01-01
Supplement: d4ta02644f3.pdf [file d4ta02644f3.pdf]

## Supporting Information

### **Tough, Recyclable and Degradable Plastics with Multi-functions Based on Supramolecular Covalent Adaptive Networks**

Shi-Yi Chen,<sup>a</sup> Sumaira Noor,<sup>b</sup> Zhen Li,<sup>b</sup> Zi-Han Zhao<sup>\*c</sup> and Cheng-Hui Li<sup>\*a</sup>

#### **Affiliations:**

<sup>a</sup>State Key Laboratory of Coordination Chemistry, School of Chemistry and Chemical Engineering, Nanjing National Laboratory of Microstructures, Collaborative Innovation Center of Advanced Microstructures, Nanjing University, Nanjing, 210023, P. R. China.

<sup>b</sup>State key Laboratory of Pharmaceutical Biotechnology, School of Life Sciences, Nanjing University, Nanjing, 210023, P. R. China.

<sup>c</sup>School of Chemistry and Chemical Engineering, Nanjing University of Science and Technology, Nanjing, 210094, P. R. China.

**\*Correspondence to:** [ZihanZhao@njust.edu.cn](mailto:ZihanZhao@njust.edu.cn); [chli@nju.edu.cn](mailto:chli@nju.edu.cn)

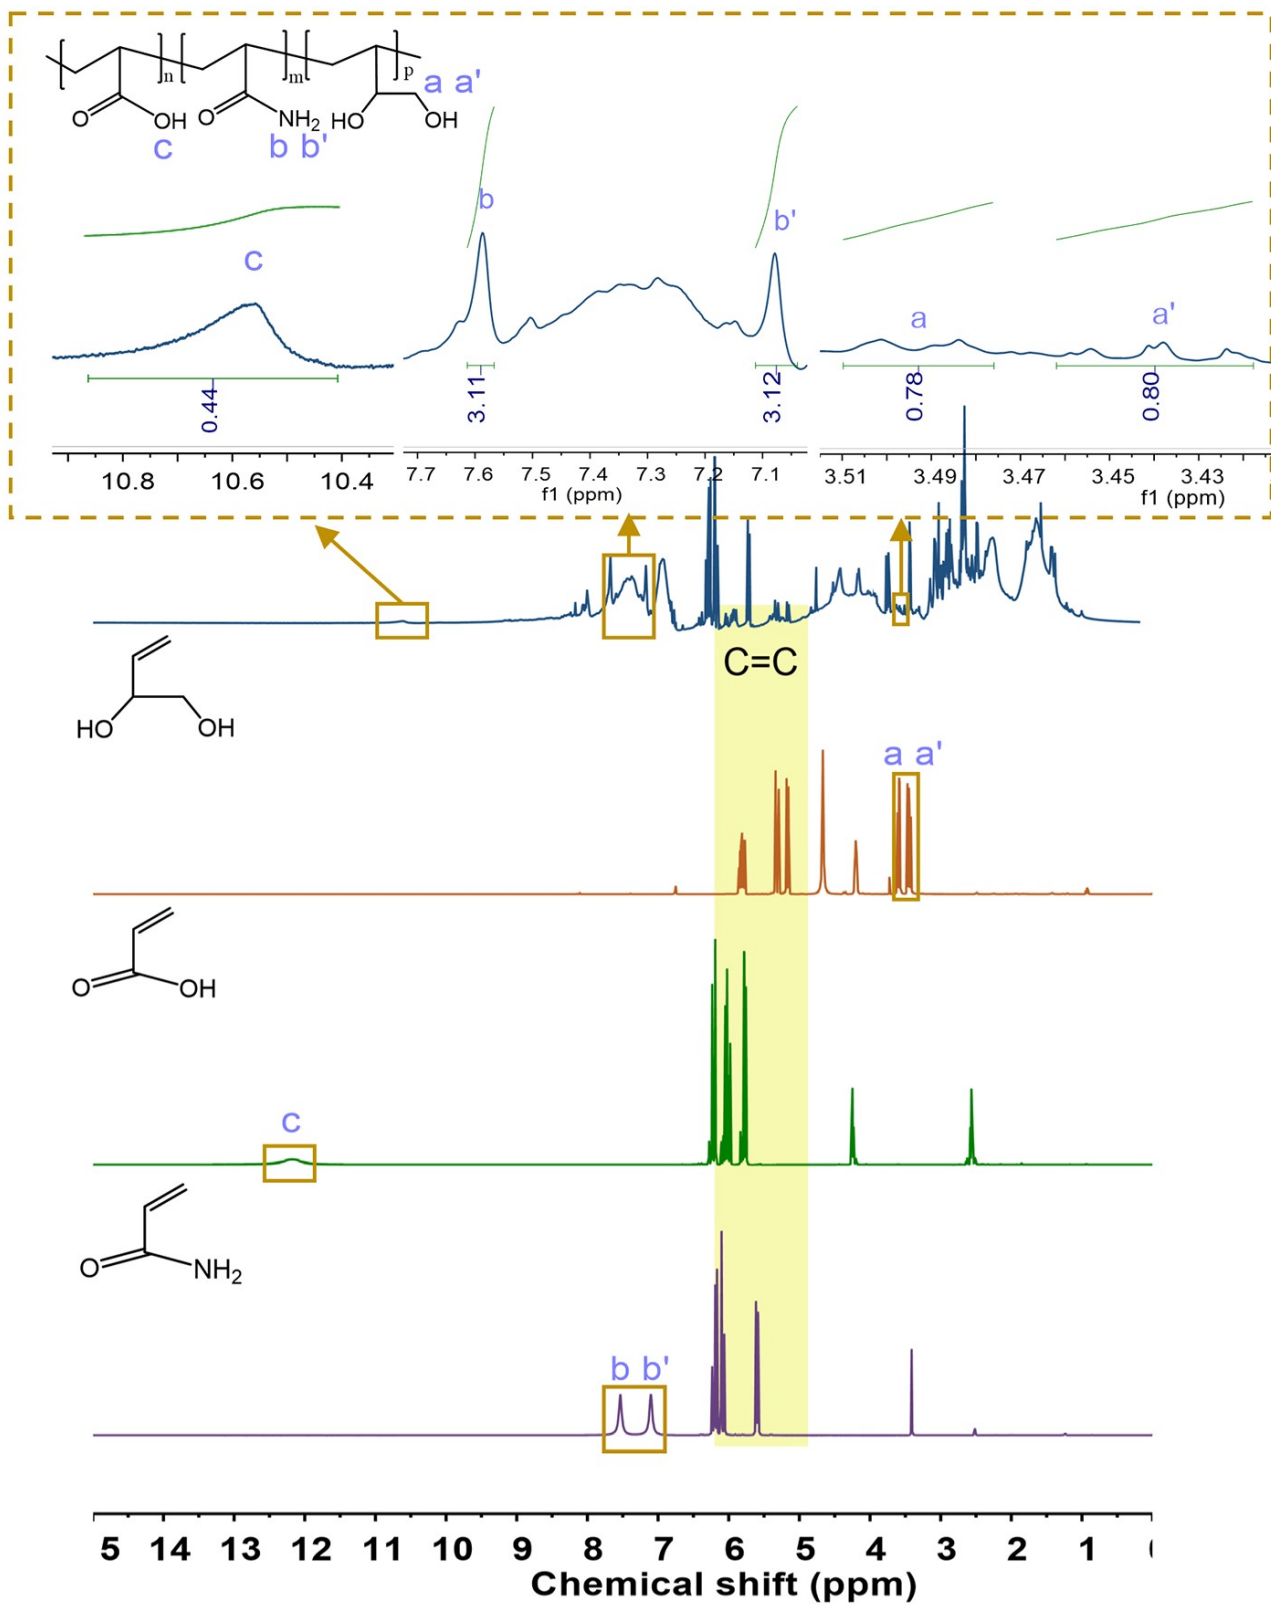

**Figure S1.**  $^1\text{H}$  NMR (400 MHz,  $\text{DMSO-d}_6$ ) spectrum of P (AA-co-AAm-co-6CI), AA, and AAm, and  $^1\text{H}$  NMR (400 MHz,  $\text{CDCl}_3$ ) spectrum of 6CI.

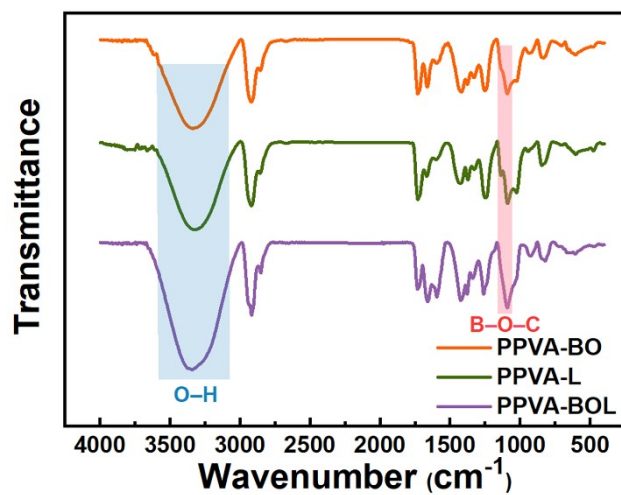

**Figure S2.** Fourier Transform infrared spectroscopy (FTIR) spectra of PPVA-BO, PPVA-L and PPVA-BOL.

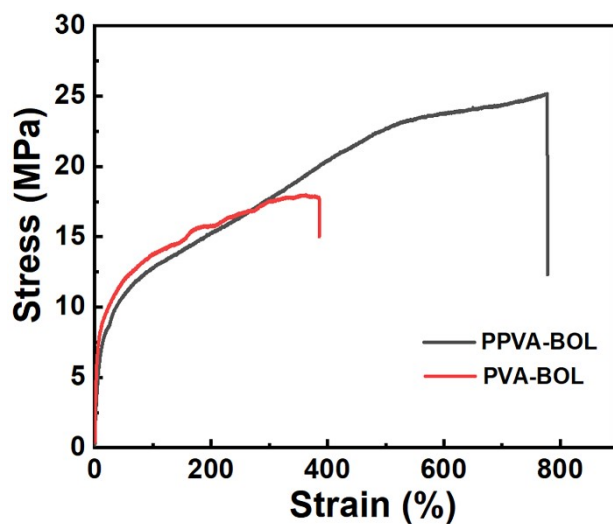

**Figure S3.** Typical cyclic stress-strain tests of the PPVA-BOL and PVA-BOL.

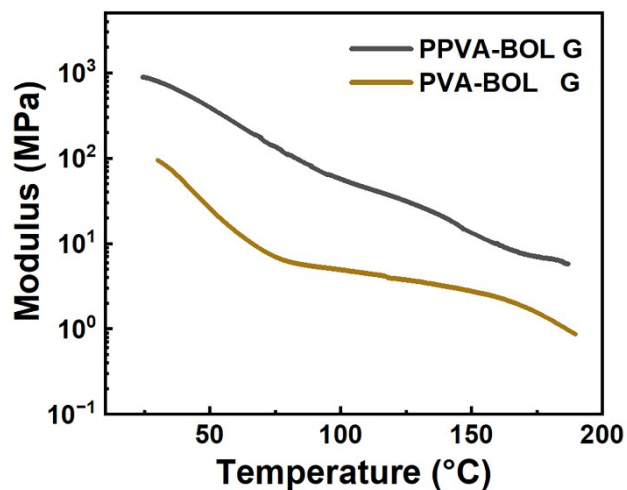

**Figure S4.** Storage modulus of PPVA-BOL and PVA-BOL by dynamic mechanical analysis.

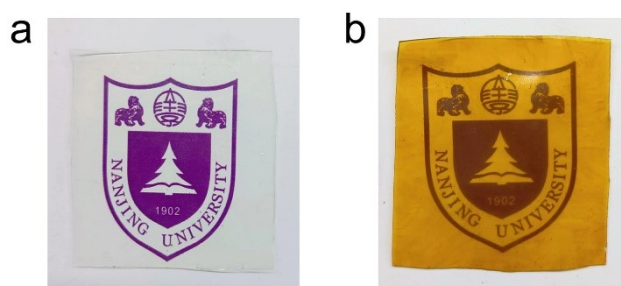

**Figure S5.** (a) The PPVA-BO plastic, (b) and the PPVA-BOL plastic were placed on the pattern of the Nanjing University logo, respectively.

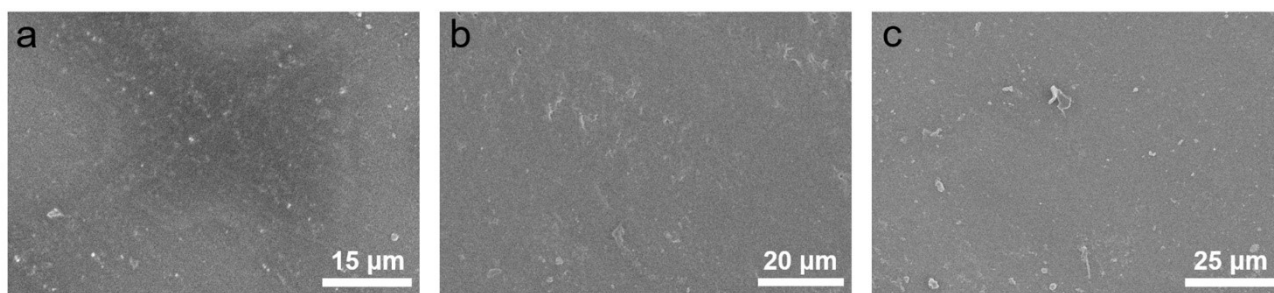

**Figure S6.** Scanning electron microscopy images of the PPVA-BOL plastic at different microscopic scales.

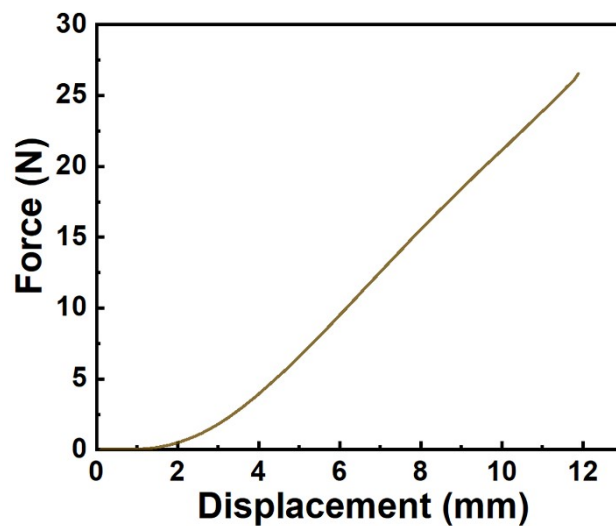

**Figure S7.** Puncture curve of the PPVA-BOL.

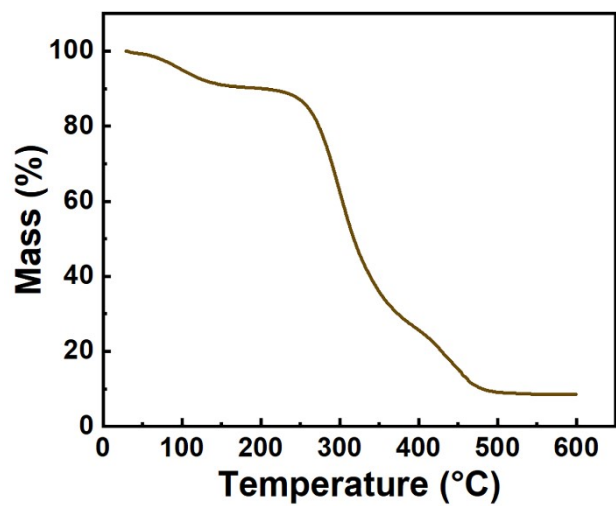

**Figure S8.** Thermal gravimetric analysis curve of the PPVA-BOL.

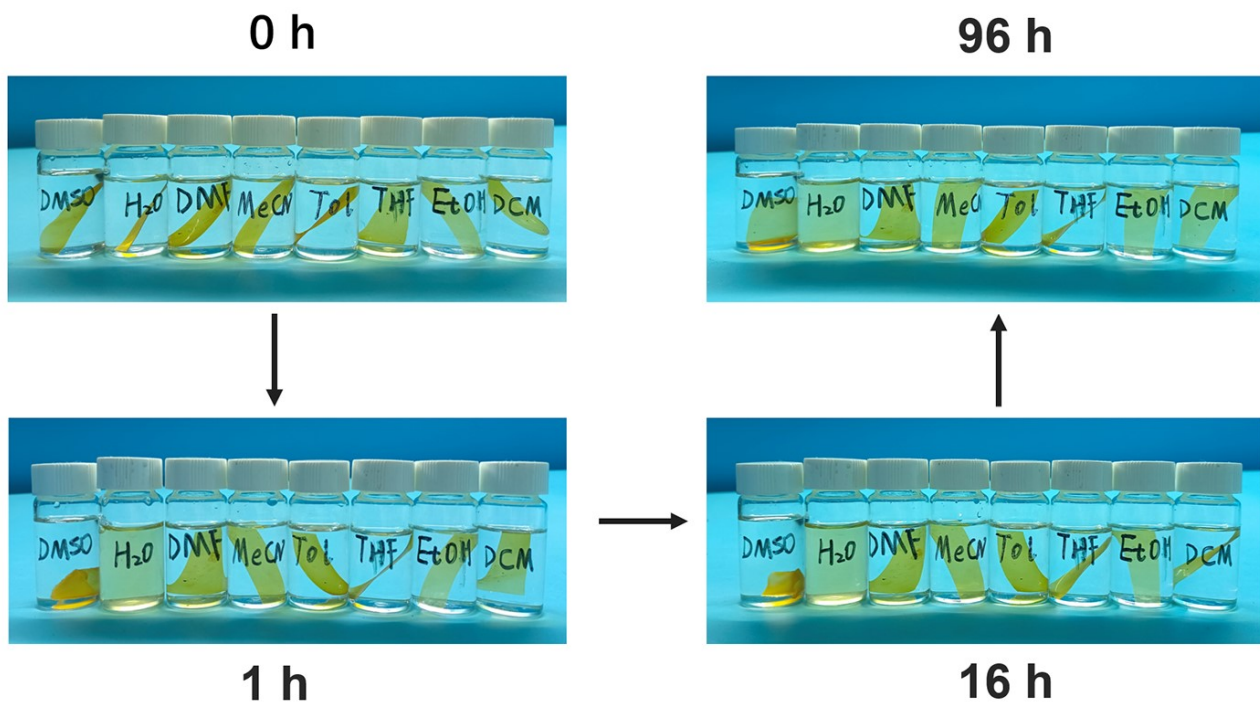

**Figure S9.** The PPVA-BOLs were immersed in water and different organic solvents for 0, 1, 16 and 96 h.

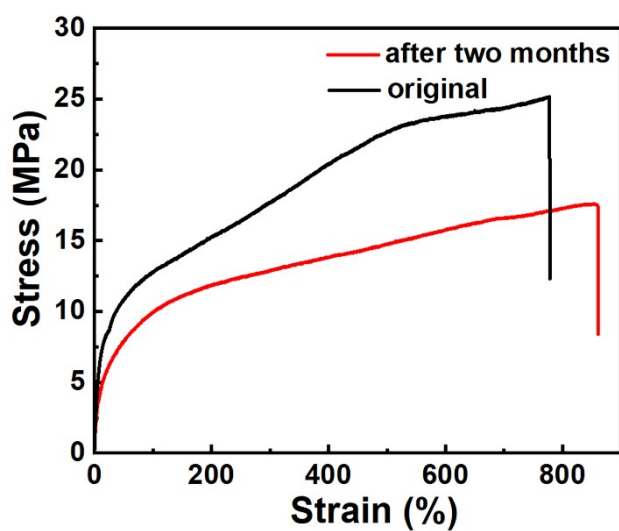

**Figure S10.** Stress-strain curves of the original sample with 10% water content and the sample placed in a constant humidity chamber at 60% humidity for two months.

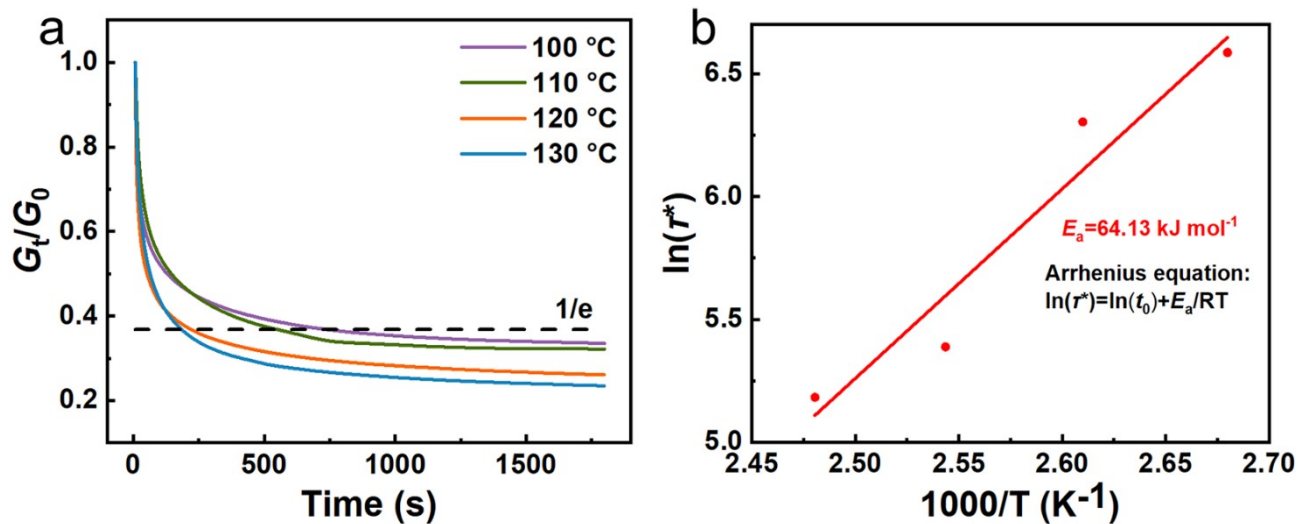

Figure S11. (a) The stress relaxation, (b) and calculated activation energy of PPVA-L.

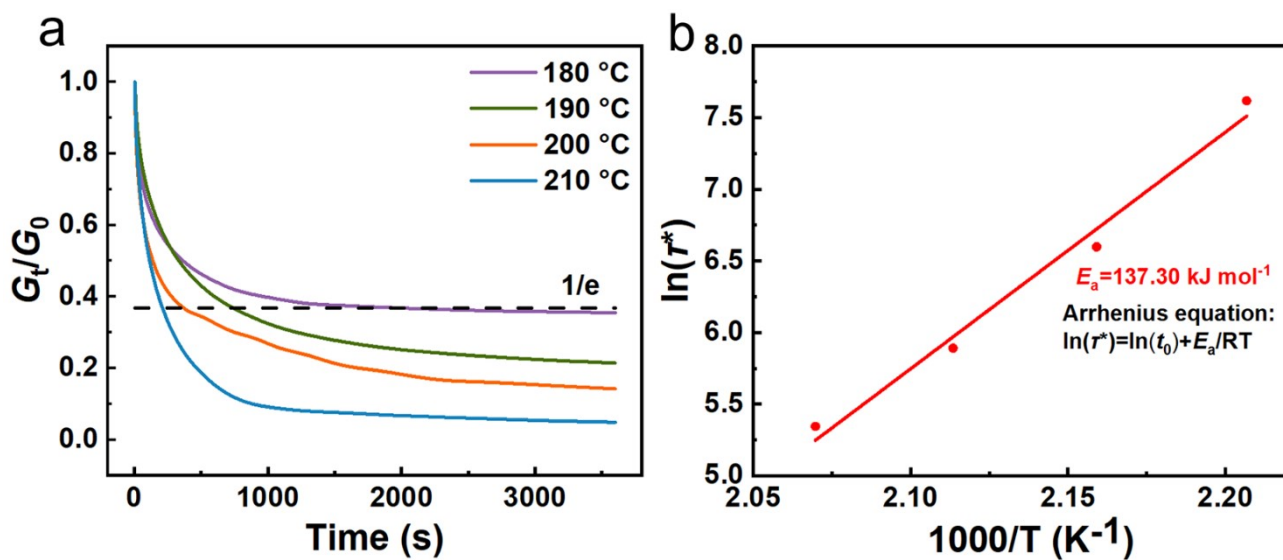

Figure S12. (a) The stress relaxation, (b) and calculated activation energy of PPVA-BO.

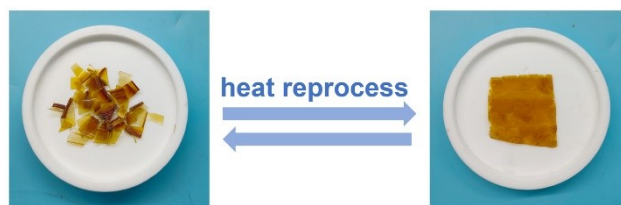

Figure S13. Heat-pressing of the completely dried PPVA-BOL.

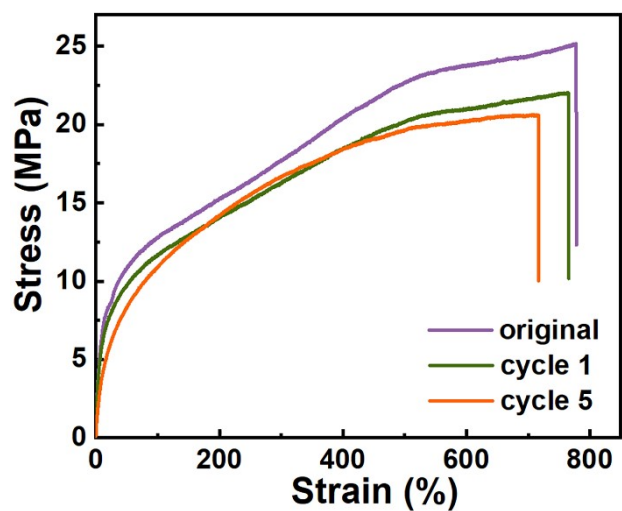

**Figure S14.** Stress-strain curves of the original sample and the sample after 1 and 5 times of hot press recycling.

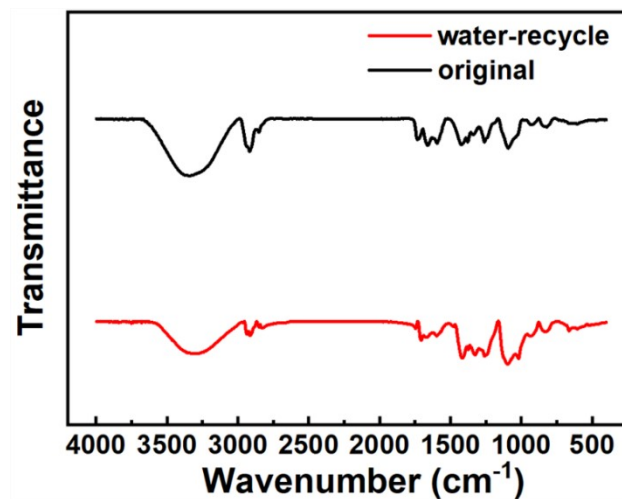

**Figure S15.** FTIR spectra of samples before and after water recycling.

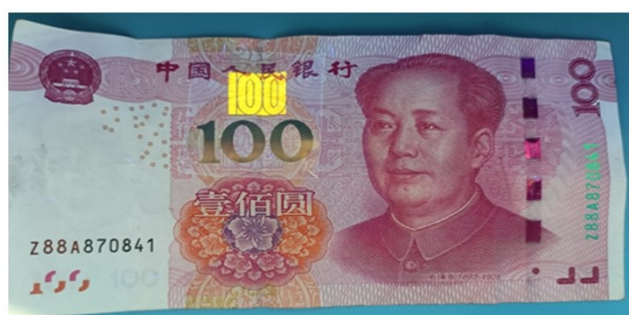

**PPVA-BO**

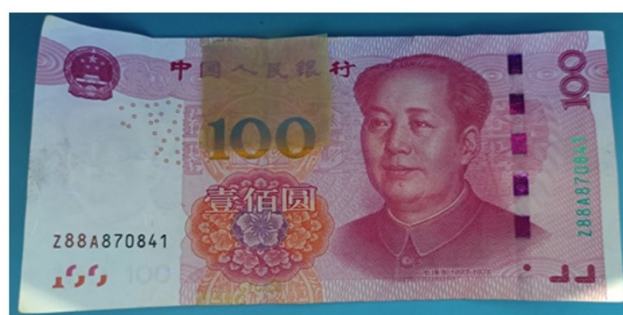

**PPVA-BOL**



**Figure S16.** Photographs of banknotes covered with the PPVA-BO film and the PPVA-BOL film with 365 nm UV irradiation.

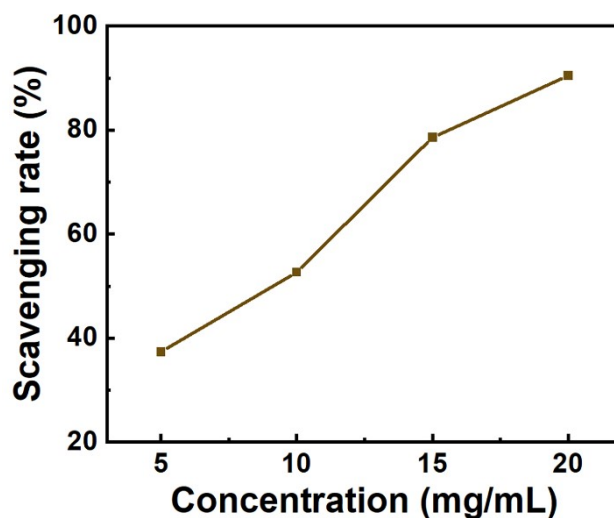

**Figure S17.** The radical scavenging rates after 3.5 h with different concentrations of PPVA-BOL aqueous solutions.

**Table S1.** Creep rates of the PPVA-BOL plastic in different temperatures.

| Temperature (°C) | $\dot{\epsilon}$ (% s <sup>-1</sup> ) |
|------------------|---------------------------------------|
| 60               | $1.5 \times 10^{-5}$                  |
| 80               | $5.8 \times 10^{-5}$                  |
| 100              | $2.9 \times 10^{-4}$                  |

**Table S2.** Changes in mass, water absorption and water content of the PPVA-BOL plastic placed in a constant humidity chamber at 60% humidity for various days.

| Time (day) | m (g) | Water absorption rate (g day <sup>-1</sup> ) | Water content (%) |
|------------|-------|----------------------------------------------|-------------------|
|------------|-------|----------------------------------------------|-------------------|

|    |        |        |       |
|----|--------|--------|-------|
| 0  | 0.7873 | 0      | 0     |
| 1  | 0.8619 | 0.0746 | 8.61  |
| 2  | 0.8928 | 0.0309 | 11.82 |
| 4  | 0.9039 | 0.0056 | 12.90 |
| 15 | 0.9515 | 0.0043 | 17.26 |
| 60 | 1.1045 | 0.0034 | 28.72 |

**Table S3.** Dissolution time of PVAs in water with different molecular weights and hydrolysis degrees.

| Molar mass (g/mol) | Hydrolysis (%) | Water dissolution time<br>(min) |
|--------------------|----------------|---------------------------------|
| 9500               | 80             | 28                              |
| 27000              | 88             | 19                              |
| 100000             | 99             | slight swelling                 |

**Movie S1.** The PPVA-BOL film dissolved quickly in hot water at 85 °C.

**Movie S2.** The PPVA-BOL film underwent multiple folding and bending without deformation.
